# Supplementary material
Source: publisher site journal article supplement (http://www.degruyter.com/publication/journal_key/JPME/downloadAsset/JPME_JPM%20Symposium%20Program%20on%20Stillbirth%20-%20A%20Global%20Task.pdf)
Supplement: Supplementary file 1 [file JPME_JPM%20Symposium%20Program%20on%20Stillbirth%20-%20A%20Global%20Task.pdf]

# Understanding and Preventing Stillbirth: A Global Task

Symposium 9 September 2022

Topics from the Journal of Perinatal Medicine's Special Issue on Stillbirth

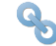

Presentations 7min + 3min Q&A, followed by Panel Discussion

NB: All Times are in CEST (Central European Summer Time)

| CEST  | Presenter              | Link to Article | Title of Presentation                                                                                                                       |
|-------|------------------------|-----------------|---------------------------------------------------------------------------------------------------------------------------------------------|
| 10:00 | Joachim Dudenhausen    |                 | Editor in Chief's Welcome                                                                                                                   |
|       | Jason Gardosi          |                 | Guest Editors' Introduction                                                                                                                 |
|       | Alexander E.P. Heazell |                 |                                                                                                                                             |
| 10:10 | <b>Session 1</b>       |                 | <b>Epidemiology and Risk Factors</b>                                                                                                        |
|       | Francesca Monari       |                 | Stillbirth occurrence during COVID-19 pandemic: a population-based prospective study                                                        |
|       | Pallavi Chandra Ravula |                 | The effect of the Covid pandemic and lockdown on stillbirth rates in a South Indian perinatal centre                                        |
|       | Frances M. Boyle       |                 | Perinatal bereavement care during COVID-19 in Australian maternity settings                                                                 |
|       | Solwayo Ngwenya        |                 | The prevalence of and risk factors for stillbirths in women with severe preeclampsia in a high-burden setting - Zimbabwe                    |
| 10:50 | <b>Discussion</b>      |                 |                                                                                                                                             |
| 11:10 | <b>BREAK</b>           |                 |                                                                                                                                             |
| 11:30 | <b>Session 2</b>       |                 | <b>Surveillance and Prevention</b>                                                                                                          |
|       | Bharti Sharma          |                 | Facility-based stillbirth surveillance review and response: an initiative towards reducing stillbirths in a tertiary care hospital of India |
|       | Nuzhat Aziz            |                 | Impact of introduction of the growth assessment protocol in a South Indian tertiary hospital                                                |
|       | Emily Butler           |                 | Evaluating the Growth Assessment Protocol for stillbirth prevention: progress and challenges                                                |
|       | Jason Gardosi          |                 | Prospective risk of stillbirth according to fetal size at term                                                                              |
| 12:10 | <b>Discussion</b>      |                 |                                                                                                                                             |
| 12:30 | <b>LUNCH</b>           |                 |                                                                                                                                             |
| 13:00 | <b>Session 3</b>       |                 | <b>Understanding the Pathology of Stillbirth</b>                                                                                            |
|       | Isabella Bourne        |                 | Abnormal placental villous maturity and dysregulated glucose metabolism: implications for stillbirth prevention                             |
|       | Susana Quesado Branco  |                 | Cardiac ion channels associated with unexplained stillbirth – an immunohistochemical study                                                  |
|       | Alexander E.P. Heazell |                 | Stillbirths preceded by reduced fetal movements are more frequently associated with placental insufficiency                                 |
|       | Maria Pekkola          |                 | Delivery characteristics in pregnancies with stillbirth. A retrospective case-control study from a tertiary teaching hospital               |
| 13:40 | <b>Discussion</b>      |                 |                                                                                                                                             |
| 14:00 | <b>BREAK</b>           |                 |                                                                                                                                             |
| 14:20 | <b>Session 4</b>       |                 | <b>Audit and Bereavement Care</b>                                                                                                           |
|       | Sara Leitao            |                 | Perinatal mortality audits and reporting of perinatal deaths: systematic review of outcomes and barriers                                    |
|       | Francesco Lupariello   |                 | Stillbirth diagnosis and classification: comparison of ReCoDe and ICD-PM systems                                                            |
|       | Themistoklis Dagklis   |                 | Investigation and management of stillbirth: a descriptive review of major guidelines                                                        |
| 14:50 | <b>Discussion</b>      |                 |                                                                                                                                             |
| 15:00 | Maria Pekkola          |                 | Stillbirth aftercare in a tertiary obstetric center – parents' experiences                                                                  |
|       | Paul Richard Cassidy   |                 | Beyond emotional support: predictors of satisfaction and perceived care quality following the death of a baby during pregnancy              |
| 15:20 | <b>Discussion</b>      |                 |                                                                                                                                             |
| 15:30 | <b>CLOSE</b>           |                 |                                                                                                                                             |
